# Supplementary material for: Wearable Finger Pulse Oximetry for Continuous Oxygen Saturation Measurements During Daily Home Routines of Patients With Chronic Obstructive Pulmonary Disease (COPD) Over One Week: Observational Study
Source: PubMed Central journal article supplement (PMC6594211; doi:10.2196/12866), 2019-06-06

Patient

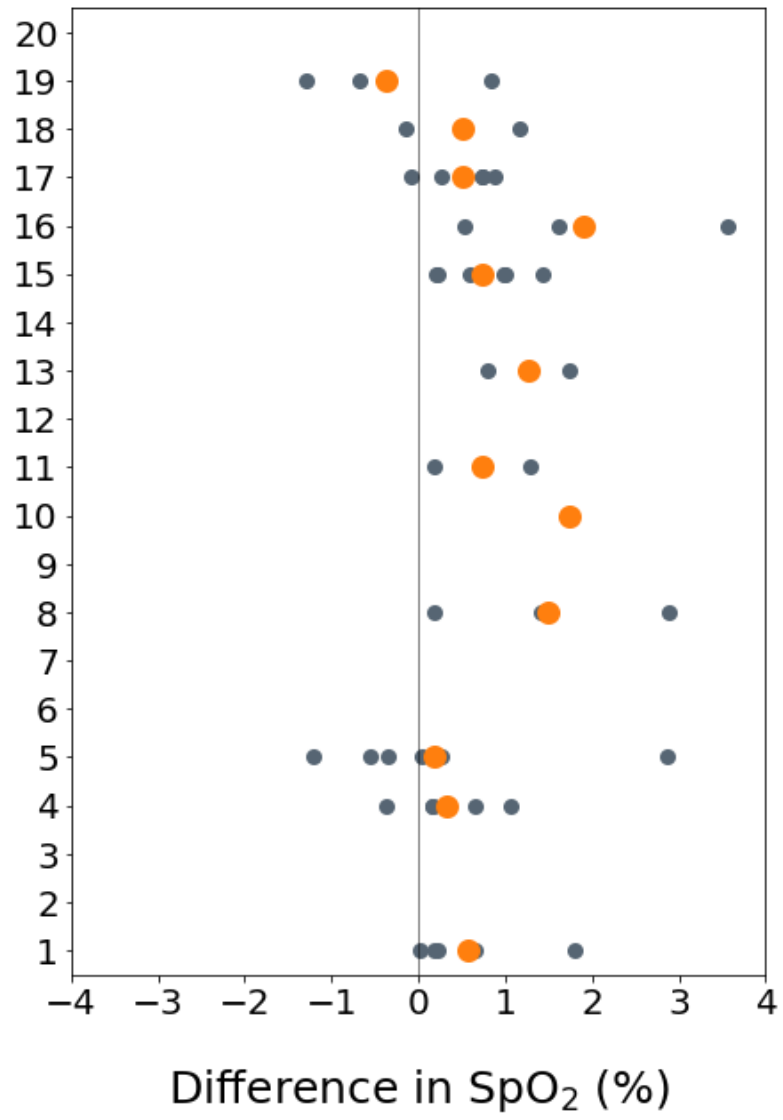

Supplement: mhealth_v7i6e12866_app3.pdf [file mhealth_v7i6e12866_app3.pdf]
